# Supplementary material for: A keratin scaffold regulates epidermal barrier formation, mitochondrial lipid composition, and activity
Source: PubMed Central journal article supplement — J Cell Biol. 2015 Dec 7;211(5):1057–75. doi: 10.1083/jcb.201404147 (PMC4674273; doi:10.1083/jcb.201404147), 2015-12-07
Supplement: supp_jcb.201404147_JCB_201404147_sm.pdf [file supp_jcb.201404147_JCB_201404147_sm.pdf]

Kumar et al., <http://www.jcb.org/cgi/content/full/jcb.201404147/DC1>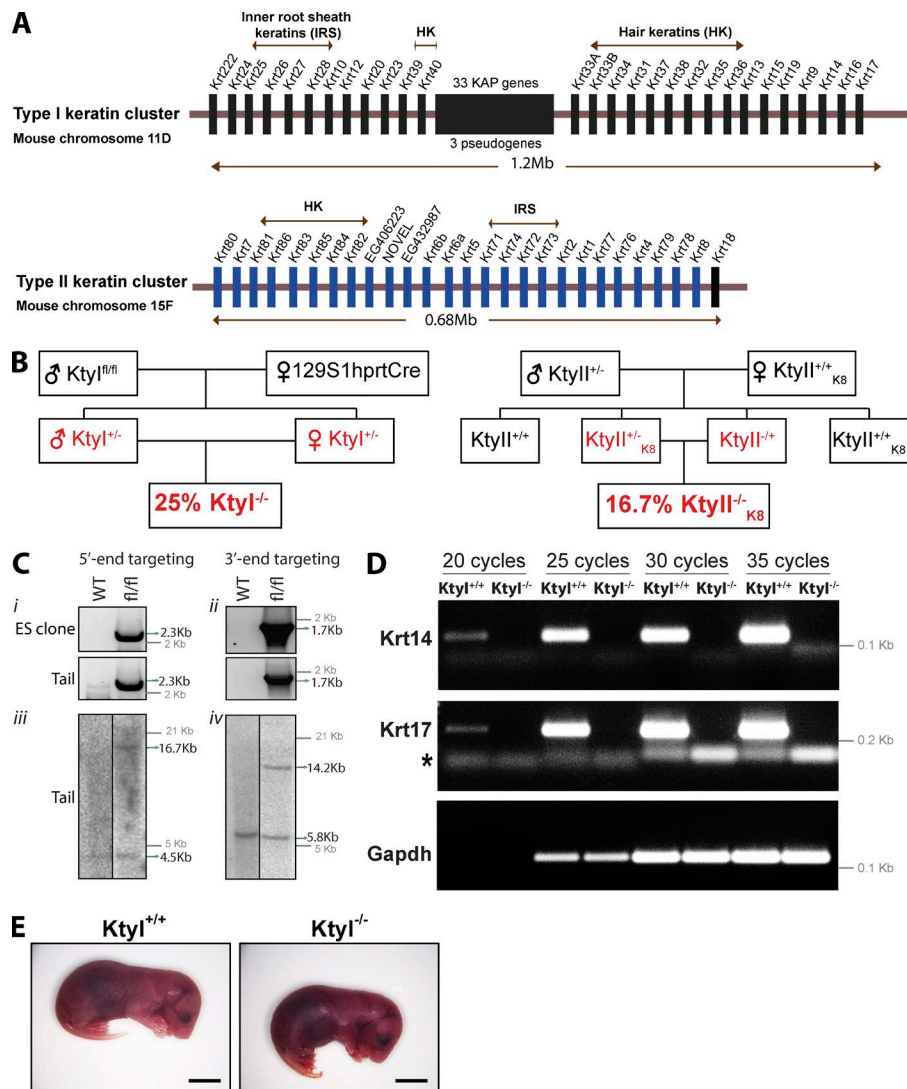

Figure S1. **Organization of keratin gene clusters and verification of keratin gene deletion.** (A) Representation of *Ktyl* and *Ktyll* keratin gene cluster arrangement on mouse chromosomes 11 and 15, respectively. Note presence of type I keratin *Krt18* on the extremity of *Ktyll* cluster. HK, hair keratin; IRS, inner root sheath keratins; KAP, keratin-associated protein-coding genes. 1.2 and 0.68 Mb indicate size of keratin gene clusters, respectively. (B) Representation of mating strategy used for generating *Ktyl*<sup>-/-</sup> and *Ktyll*<sup>-/-K8</sup> mice. (C, i and ii) PCR identifying the floxed allele at 3' and 5' end of *Ktyl* mice and ES cells. (iii and iv) Southern blot showing homozygous floxed alleles at 3' and 5' end of *Ktyl* mice. (D) Semi-quantitative PCR performed from *Ktyl*<sup>+/+</sup> and *Ktyl*<sup>-/-</sup> keratinocytes showing the absence of type I keratins *Krt14* and *Krt17*. GAPDH was used as internal control. Asterisk below *Krt17* represents position of unspecific amplicon. (E) Phenotypic appearance of *Ktyl*<sup>+/+</sup> and *Ktyl*<sup>-/-</sup> E18.5 embryos. Bars, 5 mm.

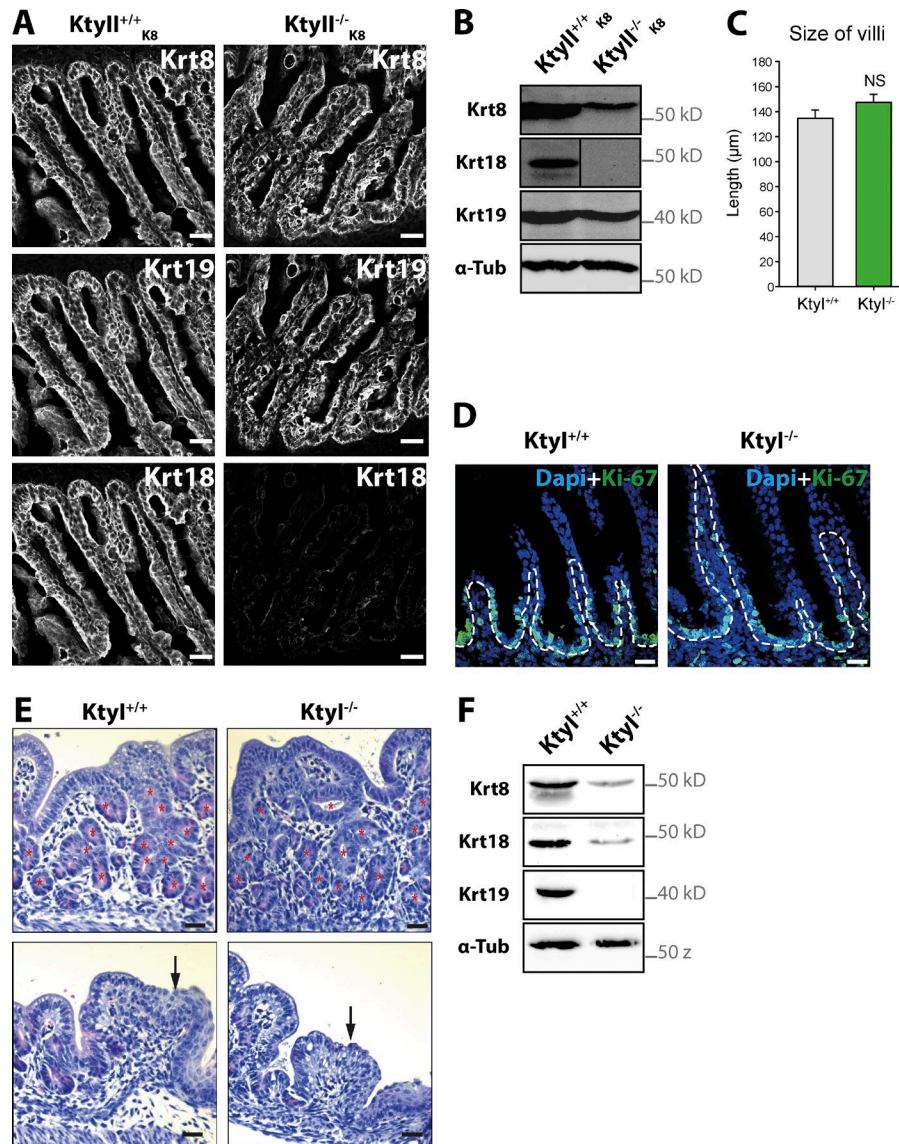

Figure S2. **Keratin expression pattern in intestine of *Ktyll<sup>+/+</sup><sub>K8</sub>* and *Ktyll<sup>-/-</sup><sub>K8</sub>* and analysis of *Ktyl<sup>+/+</sup>* and *Ktyl<sup>-/-</sup>* stomach.** (A) Immunofluorescence analysis of Krt8, Krt18, and Krt19 localization in intestines of *Ktyll<sup>+/+</sup><sub>K8</sub>* and *Ktyll<sup>-/-</sup><sub>K8</sub>* E18.5 embryos. Bars, 20 μm. (B) Western blotting of Krt8, Krt18, Krt19, and α-tubulin as loading control from intestines of *Ktyll<sup>+/+</sup><sub>K8</sub>* and *Ktyll<sup>-/-</sup><sub>K8</sub>* E18.5 embryos. (C) Microscopic measurement of the length of the villi in *Ktyl<sup>+/+</sup>* and *Ktyl<sup>-/-</sup>* intestine. (D) Immunofluorescence labeling of Ki-67 (green) and nuclei (blue) in the intestine of *Ktyl* E18.5 embryos. The basement membrane is represented by dotted lines according to a Krt8 staining. Bars, 10 μm. The percentage of proliferative epithelial cells (Ki-67 positive) is presented in D. (E) Hematoxylin/eosin-stained sections of stomach from E18.5 *Ktyl<sup>+/+</sup>* and *Ktyl<sup>-/-</sup>* embryos. Asterisks in red indicate the gastric gland of stomach. Black arrows projecting downward indicate the transition from forestomach to stomach. The dotted box in the intestine shows the magnified version in the black box. No lesions were detected in the *Ktyl<sup>-/-</sup>* intestine with cell shape, size, and number of enterocytes appearing unaltered. The mean length of intestinal villi is comparable in *Ktyl<sup>+/+</sup>* and *Ktyl<sup>-/-</sup>*. Bars, 20 μm. Periodic acid–Schiff staining (bottom) of the stomach to identify goblet cells shows similar setting in E18.5 *Ktyl<sup>+/+</sup>* and *Ktyl<sup>-/-</sup>* embryos. Bars, 5 μm. (F) Same as B in *Ktyl<sup>+/+</sup>* and *Ktyl<sup>-/-</sup>* stomachs.

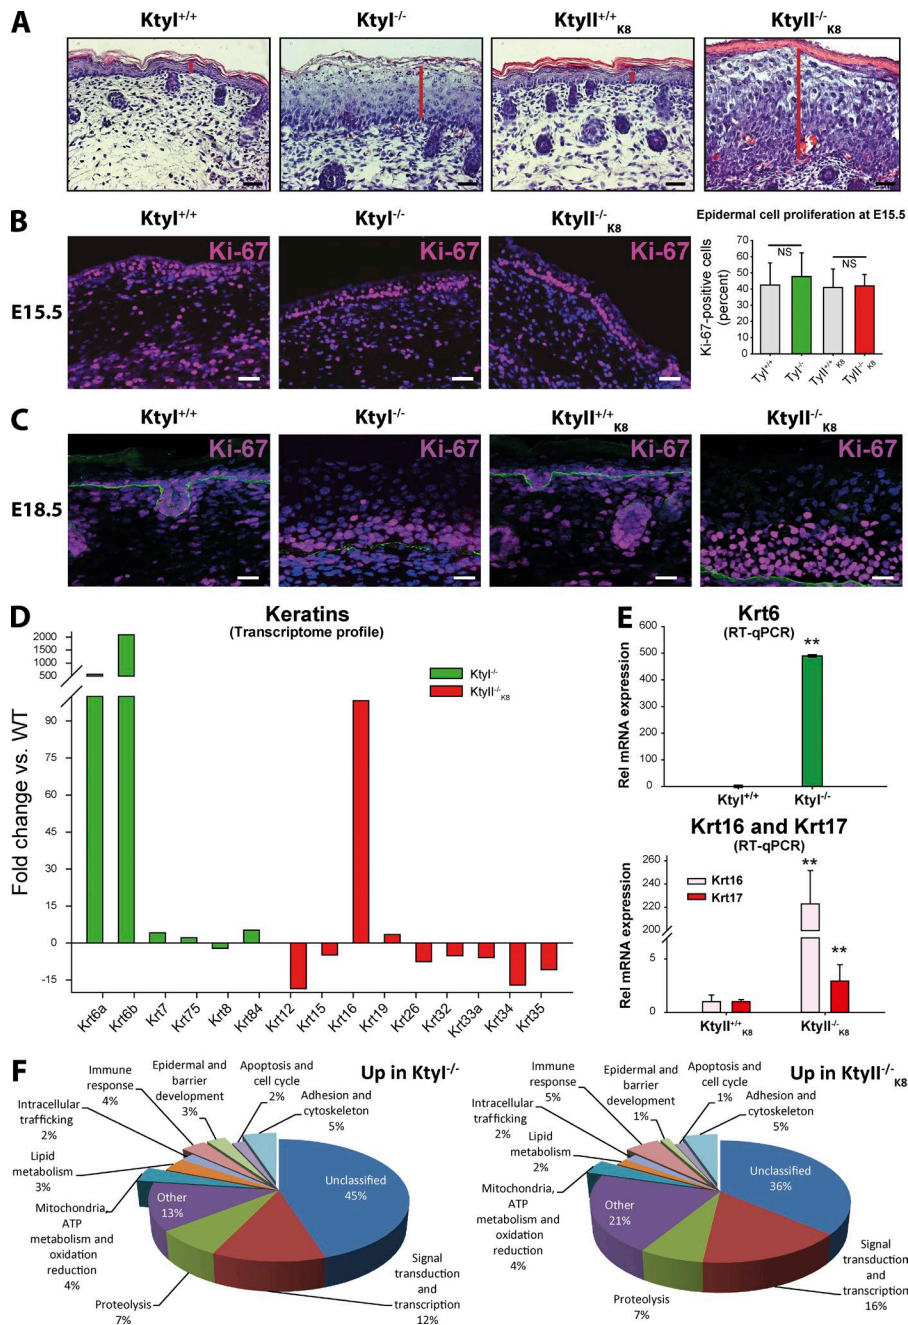

Figure S3. **Keratin-deficient skin histology, proliferation, and transcriptome profiling at E18.5.** (A) Hematoxylin/eosin-stained skin sections (see higher magnification of other pictures in Fig. 2 A); vertical red lines mark epidermal thickness. Bars, 20  $\mu$ m. (B) Immunofluorescence staining and quantification of the percentage of Ki-67-positive cells (purple) among total cells (DAPI, blue) in WT and *Ktyl*<sup>-/-</sup> and *Ktyll*<sup>-/-</sup><sub>K8</sub> epidermis at E15.5. Bars, 30  $\mu$ m. (C) Immunofluorescence staining of Ki-67 and  $\beta$ 4-integrin (green) in WT and *Ktyl*<sup>-/-</sup> and *Ktyll*<sup>-/-</sup><sub>K8</sub> epidermis at E18.5. Percentages of Ki-67-positive cells are indicated in Fig. 2 C with strong increase in keratin-deficient tissue, especially in suprabasal cell layers. Bars, 20  $\mu$ m. (D) Transcriptome data showing keratin mRNA expression changes in skin of *Ktyl*<sup>-/-</sup> and *Ktyll*<sup>-/-</sup><sub>K8</sub> compared with WT. Note strong increase of Krt6 and Krt16 and decrease of other detectable keratin mRNAs; *n* = 3. \*\*, *P*  $\leq$  0.01. (E) Quantitative RT-PCR analysis of mRNAs for Krt6 in *Ktyl*<sup>+/+</sup> and *Ktyl*<sup>-/-</sup> and Krt16 and Krt17 in *Ktyll*<sup>+/+</sup><sub>K8</sub> and *Ktyll*<sup>-/-</sup><sub>K8</sub> skin of E18.5 embryos, confirming transcriptome results. Note moderate increase of Krt17 *Ktyll*<sup>-/-</sup><sub>K8</sub> skin. (F) Gene set enrichment analysis and gene ontology classification according to function of upregulated genes in keratin-deficient skin compared with WT at E18.5. Compared with WT, 970 and 1,179 genes were upregulated in *Ktyl*<sup>-/-</sup> and *Ktyll*<sup>-/-</sup><sub>K8</sub>, respectively.

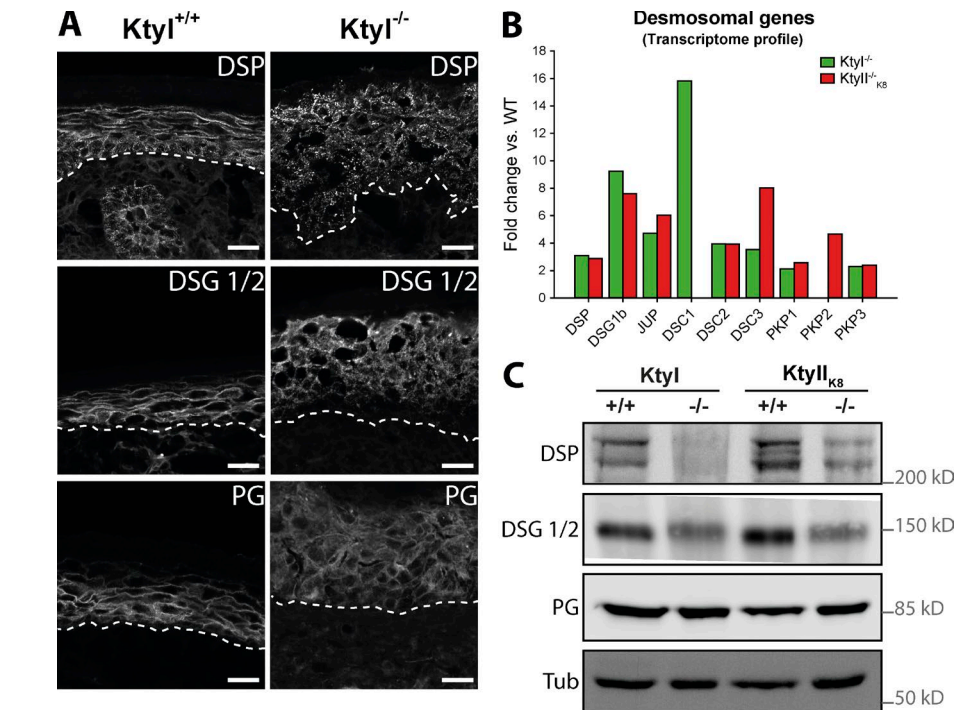

Figure S4. **Similar desmosomal defects in *Ktyl*<sup>-/-</sup> and *Ktyl*<sup>-/-</sup><sub>k8</sub> epidermis.** (A) Immunofluorescence analysis of desmoplakin (DSP), desmogleins 1/2 (DSG1/2), and plakoglobin (PG) in WT and *Ktyl*<sup>+/+</sup> and *Ktyl*<sup>-/-</sup> epidermis at E18.5. Note cytoplasmic accumulation of DSP and DSG1/2, but not PG. The basement membrane is indicated by white dotted lines. Bars, 20  $\mu$ m. (B) Transcriptional upregulation of most desmosomal genes in *Ktyl*<sup>-/-</sup> and *Ktyl*<sup>-/-</sup><sub>k8</sub> skins based on transcriptome profiling;  $n = 3$ . (C) Western blotting showing decrease in DSP and DSG1/2 proteins but not of PG in skin of *Ktyl*<sup>-/-</sup> and *Ktyl*<sup>-/-</sup><sub>k8</sub> E18.5 when compared with WT embryos.

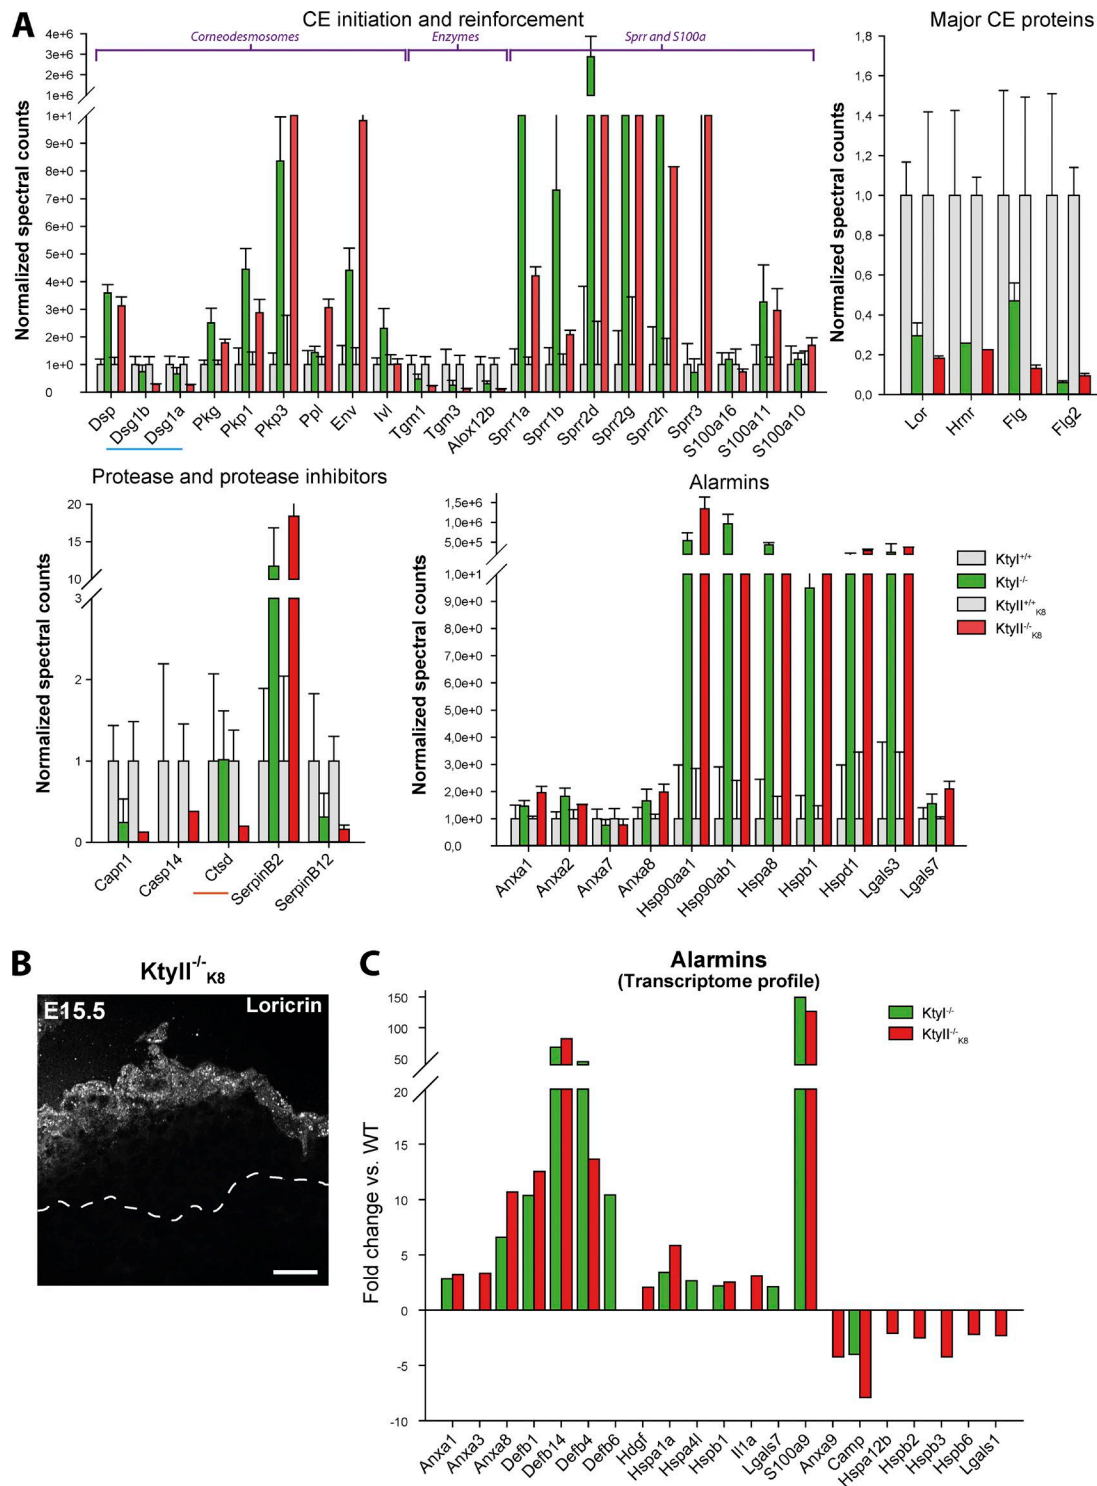

Figure S5. **Normalized CE proteome and embryonic expression of lorincrin and alarmins in keratin-deficient embryos.** (A) Related to Fig. 8; normalized CE proteome profile. When not equal to 0, spectral counts of selected proteins were normalized to 1 to compare Ktyl and Ktyll KO CE together. (B) Immunofluorescence staining of lorincrin in Ktyll<sup>-/-K8</sup> epidermis at E15.5. Bar, 20  $\mu$ m. (C) Transcriptome data showing alarmin mRNA expression changes in skin of Ktyl<sup>-/-</sup> and Ktyll<sup>-/-K8</sup> compared with WT ( $n = 3$ ).

Table S1. List of primers used in the generation and analysis of Ktyl mice

| Primer sequence                      | Product size, remarks                                                  |
|--------------------------------------|------------------------------------------------------------------------|
| Forward 5'-TTTAGAGCTTGACGGGAAAG-3'   | 2,452 bp; targeting of 5' end of keratin type I cluster by PCR         |
| Reverse 5'-TCAGGATGGCCTACAGATCAC-3'  |                                                                        |
| Forward 5'-GCTCTAGCCTCCATTCAAAC-3'   | 433 bp; probes of 5' end of keratin type II cluster targeted clones    |
| Reverse 5'-TGAAGCTCCTGCTTCTTCTGC-3'  |                                                                        |
| Forward 5'-CGCCTTTGAGTGAGCTGATAC-3'  | 1,780 bp; targeting of 3' end of keratin type I cluster by PCR         |
| Reverse 5'-GCTTAGGCAGCATCGTAAGTG-3'  |                                                                        |
| Forward 5'-GGAGAGGTCAGAGGCATTAGG-3'  | 497 bp; probes for 3' end of keratin type I cluster targeted clones    |
| Reverse 5'-AAAAAGGTTCCGTCGTGTTG-3'   |                                                                        |
| Forward 5'-GTGGGACTCTGTAGGACCA-3'    | 826 bp; <i>Hprt</i> primers to identify Cre-mediated deletion in mice  |
| Reverse 5'-TGAACCCAGGAGTTGAGAC-3'    |                                                                        |
| Forward 5'-AGGGCAAAGGATGTGTACG-3'    | 656 bp; 3' <i>hprt</i> probes to identify targeted and recombined loci |
| Reverse 5'-CCTGACCAAGGAAAGCAAAG-3'   |                                                                        |
| Forward 5'-CATTCTGCACGCTTCAAAG-3'    | 616 bp; 5' <i>hprt</i> probes to identify targeted and recombined loci |
| Reverse 5'-GATTGACCCAGTCCATTA-3'     |                                                                        |
| Forward 5'-TCCCAATTCTCCTATCCTC-3'    | 132 bp; primer used for <i>mK14</i> semiquantitative PCR               |
| Reverse 5'-TAGTCTTGGTGGCAGGAC-3'     |                                                                        |
| Forward 5'-AGGAGATGACCTTGCCATCCT-3'  | 219 bp; primer used for <i>mK17</i> semiquantitative PCR               |
| Reverse 5'-GGCTGATTGGCAGCGTGGAGGA-3' |                                                                        |
| Forward 5'-GTGTTCTACCCCAATGTG-3'     | 130 bp; primer used for <i>GAPDH</i> semiquantitative PCR              |
| Reverse 5'-AGGAGACAACCTGGTCTCA-3'    |                                                                        |

Table S2. List of quantitative PCR primers used for the study

| Primer            | Sequence                                 |
|-------------------|------------------------------------------|
| <i>Nrf2</i>       | Forward 5'-CATGATGGACTTGGAGTTGC-3'       |
|                   | Reverse 5'-CCTCCAAAGGATGTCAATCAA-3'      |
| <i>Nqo1</i>       | Forward 5'-CTGGCCATTAGAGAAGAC-3'         |
|                   | Reverse 5'-GTCTGCAGTCCAGTCTCT-3'         |
| <i>Gsta3</i>      | Forward 5'-TACTTTGATGGCAGGGAAAG-3'       |
|                   | Reverse 5'-GCACTTGCTGGAACATCAGA-3'       |
| <i>HMO1</i>       | Forward 5'-CCTGGTCAAGATACTGCCC-3'        |
|                   | Reverse 5'-GAAGCTGAGAGTGAGGACCCA-3'      |
| <i>Srxn1</i>      | Forward 5'-CGGTGCACAACGTACCAAT-3'        |
|                   | Reverse 5'-TTGATCCAGAGCGTCGAT-3'         |
| <i>Filaggrin</i>  | Forward 5'-GCTTAAATGCATCTCCAG-3'         |
|                   | Reverse 5'-AGTCAGTCTATTGCAGG-3'          |
| <i>Loricrin</i>   | Forward 5'-CACTCATCTTCCCTGGTGT-3'        |
|                   | Reverse 5'-TCCACCAGAGGCTTTCCAC-3'        |
| <i>Involucrin</i> | Forward 5'-GGTGTACAGAAGCTTCCAAGATGTCC-3' |
|                   | Reverse 5'-GGCATTGTGTAGGATGTGGAGTTGG-3'  |
| <i>Krt8</i>       | Forward 5'-TGGAGGGGAGGAGAGCAG-3'         |
|                   | Reverse 5'-AAGGTTGGCCAGAGATTAGG-3'       |
| <i>Krt16</i>      | Forward 5'-GTGAAGATCCGGGACTGGTA-3'       |
|                   | Reverse 5'-CATTCTCCTGGTGGCAATA-3'        |
| <i>Krt17</i>      | Forward 5'-AGGAGATGACCTTGCCATCCT-3'      |
|                   | Reverse 5'-GGCTGATTGGCAGCGTGGAGGA-3'     |
| <i>Krt14</i>      | Forward 5'-TCCCAATTCTCCTATCCTC-3'        |
|                   | Reverse 5'-TAGTCTTGGTGGCAGGAC-3'         |
| <i>Hornerin</i>   | Forward 5'-CGGTGTCTGGATCATCTGG-3'        |
|                   | Reverse 5'-CCTGAAAGCATTGTCACTGT-3'       |
| <i>Krt5</i>       | Forward 5'-CGCTACCCAAACCAAGACC-3'        |
|                   | Reverse 5'-TCAAACCTGGGAATGTCTC-3'        |
| <i>Gapdh</i>      | Forward 5'-GTGTTCTACCCCAATGTG-3'         |
|                   | Reverse 5'-AGGAGACAACCTGGTCTCA-3'        |

Table S3. List of dye and antibodies used for this study

| Targets (immunogen)                      | Antibodies/<br>fluorochromes      | Hosts      | Dilution   |              | Sources                | References           |
|------------------------------------------|-----------------------------------|------------|------------|--------------|------------------------|----------------------|
|                                          |                                   |            | Microscopy | Western blot |                        |                      |
| Krt1 (mKrt5 625–637)                     | Krt1                              | Rabbit     | 1:400      | 1:1,000,000  | Magin laboratory       | –                    |
| Krt10                                    | DE-K10                            | Mouse      | 1:150      | 1:10,000     | Dako                   | M7002                |
| Krt14 (mKrt14 471–484)                   | Krt14                             | Rabbit     | 1:500      | 1:500        | Magin laboratory       | –                    |
| Krt18                                    | KS 18.04                          | Mouse      | 1:20       | 1:30,000     | Progen                 | 61028                |
| Krt19 (full length)                      | TROMA.3                           | Rat        | 1:100      | 1:50,000     | Baribault et al., 1994 | –                    |
| Krt5 (head domain)                       | Krt5                              | Guinea pig | 1:300      | –            | Magin laboratory       | Betz et al., 2006    |
| Krt5 (hKrt5 1–16)                        | Krt5                              | Rabbit     | –          | 1:30,000     | Magin laboratory       | –                    |
| Krt6 (mKrt6a 539–553;<br>mKrt6b 548–562) | Krt6                              | Rabbit     | 1:1,000    | 1:300,000    | Magin laboratory       | –                    |
| Krt8 (full length)                       | TROMA.1                           | Rat        | 1:1        | 1:100        | Baribault et al., 1994 | –                    |
| Actin-F                                  | Phalloidin-Alexa647               | –          | 2U         | –            | Invitrogen             | A22287               |
| Actin-β                                  | β-actin                           | Mouse      | –          | 1:5,000      | Sigma-Aldrich          | A1978                |
| Core2                                    | CORE-2                            | Mouse      | –          | 1:1,000      | Abcam                  | ab14745              |
| Cox1                                     | COX1                              | Mouse      | –          | 1:1,000      | Invitrogen             | 459600               |
| Desmoglein 1/2                           | DG 3.10                           | Mouse      | 1:10       | 1:500        | Progen                 | 61002                |
| Desmoplakin (mDsp<br>2857-2875)          | DP-CT                             | Guinea pig | 1:200      | 1:1,000      | Magin laboratory       | –                    |
| E-cadherin                               | CDH1 Antibody<br>(ECCD-2)         | Rat        | 1:1,000    | –            | Invitrogen             | 13-1900              |
| Filaggrin                                | Anti Filaggrin                    | Rabbit     | 1:1,000    | 1:10,000     | Harbor Bio-Products    | GTX37695             |
| Hsp60                                    | Hsp60                             | Rabbit     | 1:700      | –            | Abcam                  | ab46798              |
| Integrin-β4                              | 346-11A                           | Rat        | 1:50       | –            | BD                     | 553745               |
| Involucrin                               | Involucrin polyclonal<br>antibody | Rabbit     | 1:500      | 1:200,000    | Covance                | PRB-140C             |
| Keap1                                    | D6B12                             | Rabbit     | –          | 1:1,000      | Cell Signaling         | 8047                 |
| Ki-67                                    | SolA15                            | Rat        | 1:100      | –            | eBioscience            | 41-5698              |
| Loricrin                                 | AF 62                             | Rabbit     | 1:1,000    | 1:200,000    | Covance                | PRB-145 P            |
| Ndufa9                                   | NDUFA9                            | Mouse      | –          | 1:1,000      | Invitrogen             | 459100               |
| Ndufv2                                   | NDUFV2                            | Rabbit     | –          | 1:200        | Proteintech            | 15301-1-AB           |
| Nrf2 (full length)                       | Nrf2                              | Rabbit     | 1:250      | –            | Dennis Roop            | Huebner et al., 2012 |
| Plakoglobin                              | PG 5.1                            | Mouse      | 1:10       | 1:1,000      | Progen                 | 61005                |
| Sdha                                     | SDHA                              | Mouse      | –          | 1:1,000      | Invitrogen             | 459200               |
| Tubulin-α                                | DM1A                              | Mouse      | –          | 1:12,000     | Sigma-Aldrich          | T9026                |
| α-Subunit                                | α-subunit                         | Mouse      | –          | 1:1,000      | Abcam                  | ab110330             |
| Nucleus                                  | DAPI                              | –          | 1:1,000    | –            | Carl Roth              | 6335                 |
| Guinea pig IgG (H+L)                     | Anti-guinea pig-Cy3               | Donkey     | 1:800      | –            | Dianova                | 706-165-148          |
| Guinea pig IgG (H+L)                     | Anti-guinea pig-HRP               | Goat       | –          | 1:15,000     | Dianova                | 106-035-003          |
| Mouse IgG (H+L)                          | Anti-mouse-Cy3                    | Donkey     | 1:800      | –            | Dianova                | 715-165-151          |
| Mouse IgG (H+L)                          | Anti-mouse-HRP                    | Goat       | –          | 1:15,000     | Dianova                | 115-035-003          |
| Rabbit IgG (H+L)                         | Anti-rabbit-Cy3                   | Donkey     | 1:800      | –            | Dianova                | 711-165-152          |
| Rabbit IgG (H+L)                         | Anti-rabbit-HRP                   | Goat       | –          | 1:15,000     | Dianova                | 111-035-003          |
| Rat IgG (H+L)                            | Anti-rat-Alexa 488                | Donkey     | 1:800      | –            | Dianova                | 712-545-153          |
| Rat IgG (H+L)                            | Anti-rat-HRP                      | Goat       | –          | 1:15,000     | Dianova                | 112-035-003          |

–, not applicable.

## References

- Baribault, H., J. Penner, R.V. Iozzo, and M. Wilson-Heiner. 1994. Colorectal hyperplasia and inflammation in keratin 8-deficient FVB/N mice. *Genes Dev.* 8:2964–2973. <http://dx.doi.org/10.1101/gad.8.24.2964>
- Betz, R.C., L. Planko, S. Eigelshoven, S. Hanneken, S.M. Pasternack, H. Bussow, K. Van Den Bogaert, J. Wenzel, M. Braun-Falco, A. Rutten, et al.. 2006. Loss-of-function mutations in the keratin 5 gene lead to Dowling-Degos disease. *Am. J. Hum. Genet.* 78:510–519. <http://dx.doi.org/10.1086/500850>
- Huebner, A.J., D. Dai, M. Morasso, E.E. Schmidt, M. Schäfer, S. Werner, and D.R. Roop. 2012. Amniotic fluid activates the nrf2/keap1 pathway to repair an epidermal barrier defect in utero. *Dev. Cell.* 23:1238–1246. <http://dx.doi.org/10.1016/j.devcel.2012.11.002>
